# Supplementary material for: Conjugation of carboxymethyl cellulose and dopamine for cell sheet harvesting
Source: Royal Society of Chemistry journal article supplement (doi:10.1039/c8bm00971f), 2018-10-29

Supporting Information for:

## Conjugation of carboxyl methyl cellulose and dopamine for cell sheet harvesting

Soyoung Hong, Jeong Hey Sunwoo, Ji Seon Kim, Hungwon Tchah, Changmo Hwang

Contents:

1. Single Cell areas from LIVE/DEAD® assay using ImageJ software (NIH)
2. **Table S1.** Oligonucleotide sequences of the primer pairs used for RT-PCR
3. **Table S2.** Antibodies list for IF staining
4. **Figure. S1. TOF-SIMS data** (a) ion spectra of the coated CMC-DA surface and non-coated surface. (b) The negative ion depth profile during sputter time 150s
5. **Figure. S2.** Distribution of cell areas from the detached single hMSCs with cellulase or trypsin/EDTA.
6. **Figure. S3.** The normalized cell viability of the cellulase with various concentrations (0, 10, 20, 50, 100 U/ml in medium) after 1hr in cultured cells.
7. **Movie. S1.** The detachment process of the hMSC sheets 10 min after 50 U/ml cellulase treatment (The file was uploaded separately: Electronic supplementary information)
8. **Figure. S4.** Transparency of hCLE sheet with various diameter.
9. **Figure. S5.** The permeability of a CMC-DA-coated transwell membrane with DMEM medium.
10. **Figure. S6. Degradation of CMC-DA.** The CMC-DA-coated surface was treated with 100 U/ml cellulase for 3 hours, and then we checked the glucose concentration over time using a glucose assay kit. The results showed the glucose was increased with time after cellulase treatment.

### **Single Cell areas from LIVE/DEAD® assay using ImageJ software (NIH)**

Digital images of stained cells were captured using confocal microscopy and were processed in ImageJ in the following manner: (1) Using *Image* ☐ *Color* ☐ *Split Channels*, channels were separated for live and dead fluorescence channels. (2) Using *image*  $\rightarrow$  *type*  $\rightarrow$  *8 bit*, with green channel. (3) Using *Image* ☐ *Adjust* ☐ *Threshold*, a constant threshold level was set across a set of conditions to ensure that sufficient signal was present to identify viable cells. (4) Using *Process* ☐ *Binary* ☐ *make binary*. (5) Using *Analyze* ☐ *Analyze Particles* a constant area exclusion filter was applied to ensure that tiny specs signal, likely from debris or instrument artifacts, were excluded from the final counts of live or dead cells. The areas of particle were displayed and analyzed.

**Table S1.** Oligonucleotide sequences of the primer pairs used for RT-PCR

| Name           | Sense Primer                       | Anti-sense Primer               |
|----------------|------------------------------------|---------------------------------|
| FAK            | TTC-ATT-ATT-TTG-AAA-GCA-ATA-GT     | CAA-CCC-AAC-TTC-AAA-GCA-ATT-TC  |
| RhoA           | CTC-ATA-GTC-TTC-AGC-AAG-GAC-CAG-TT | ATC-ATT-CCG-AAG-ATC-CTT-CTT-ATT |
| RhoB           | ATG-GCG-GCC-ATC-CGC-AAG-AAG-C      | TCA-TAG-CAC-CTT-GCA-GCA-GTT-G   |
| P53            | GGAGCACTAAGCGAGCACTG               | ATGGCGGGAGGTAGACTGAC            |
| $\beta$ -Actin | CGT-ACC-ACT-GGC-ATC-GTG            | GTG-TTG-GCG-TAC-AGG-TCT-TTG     |

**Table S2.** Antibodies list for IF staining

| Name        | Type        | Dilution | Company, No.      | Annotation           |
|-------------|-------------|----------|-------------------|----------------------|
| Collagen I  | Rabbit Poly | 1:100    | Abcam<br>ab34710  | Extracellular Matrix |
| Collagen IV | Rabbit Poly | 1:100    | Abcam<br>ab6586   | Extracellular Matrix |
| Laminin     | Rabbit Poly | 1:100    | Abcam<br>ab11575  | Extracellular Matrix |
| Phalloidin  |             | 1:40     | Thermo<br>R415    | F-actin              |
| ZO-1        | Rabbit Poly | 1:100    | Thermo<br>61-7300 | Cell junction        |
| P63         | Rabbit Mono | 1:100    | Abcam<br>Ab124762 | Epithelial stem cell |

**Figure. S1. TOF-SIMS data** (a) Ion spectra of the coated CMC-DA surface and non-coated surface. (b) The negative ion depth profile during sputter time 150s

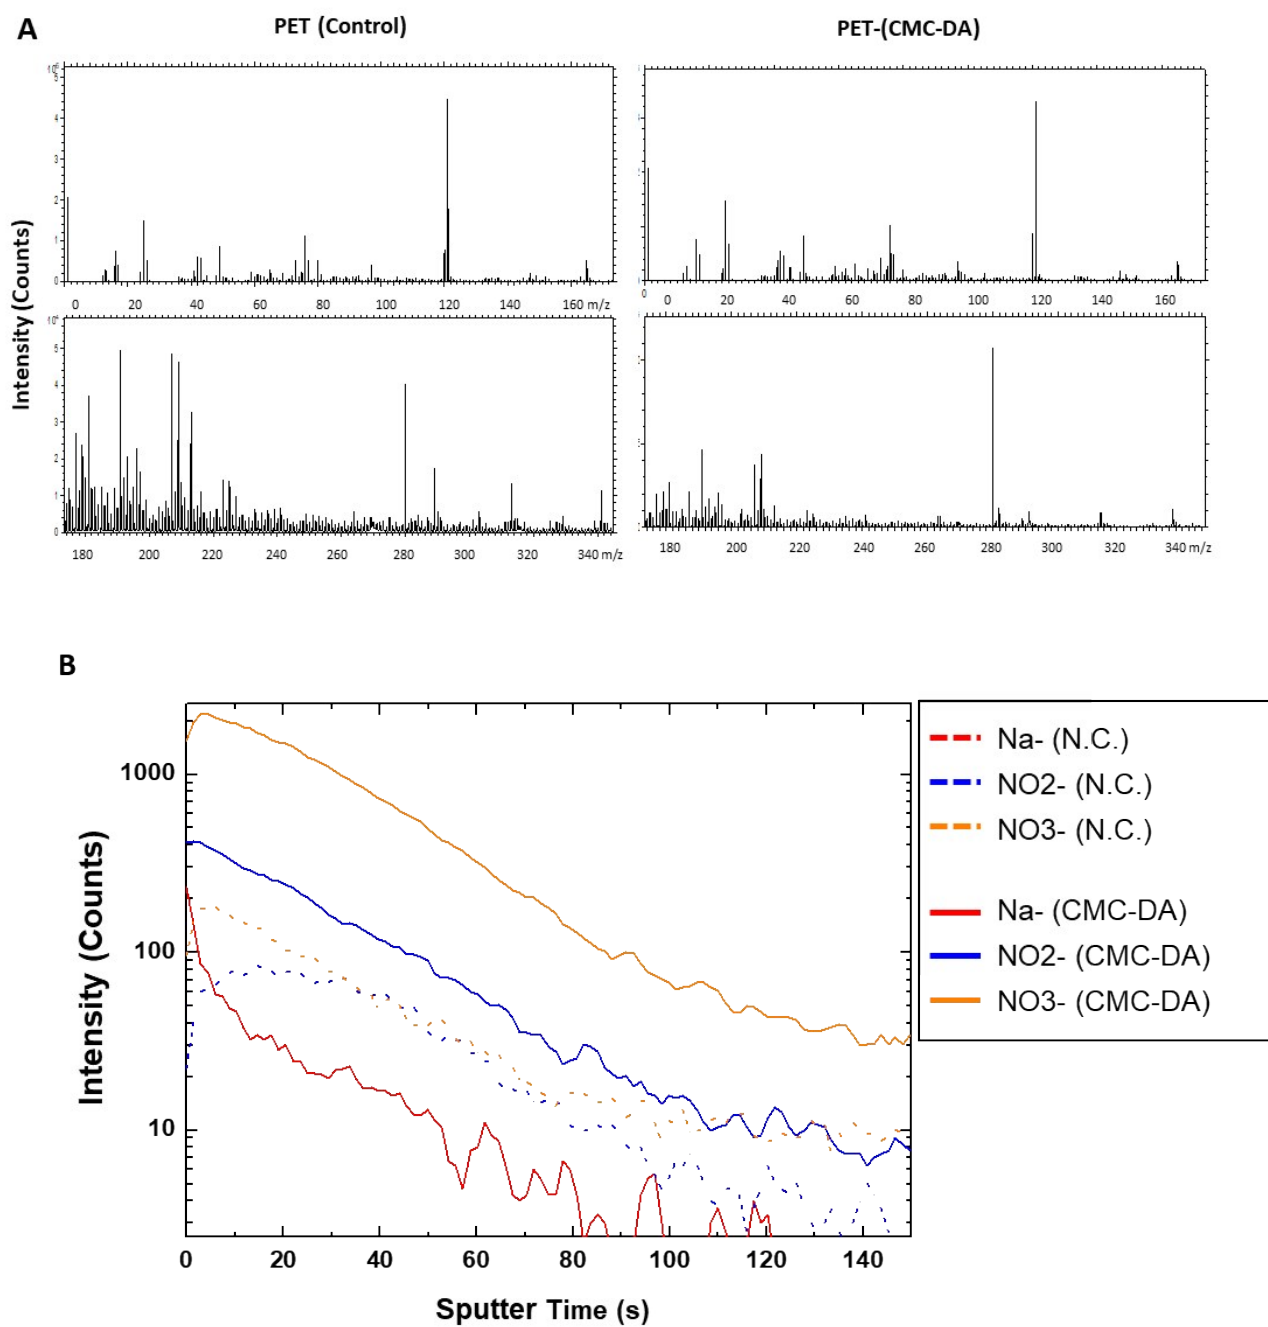

**Figure. S2.** Distribution of cell areas from the detached single hMSCs with cellulase or trypsin/EDTA.

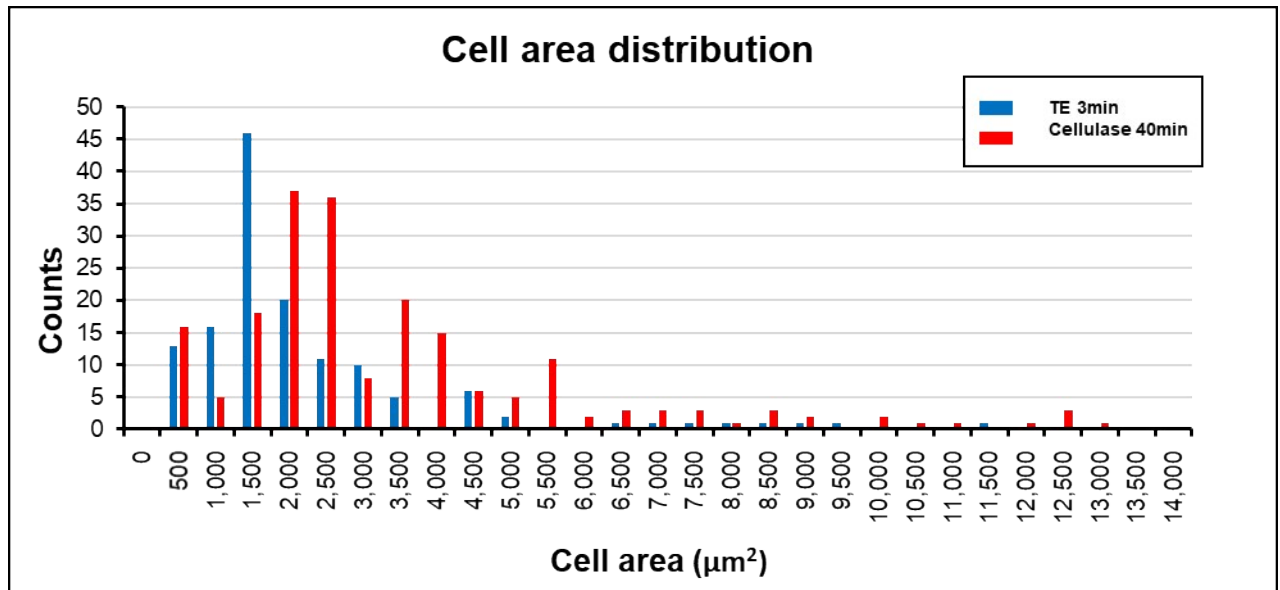

**Figure. S3.** The normalized cell viability of the cellulase with various concentrations (0, 10, 20, 50, 100 U/ml in medium) after 1hr in cultured cells.

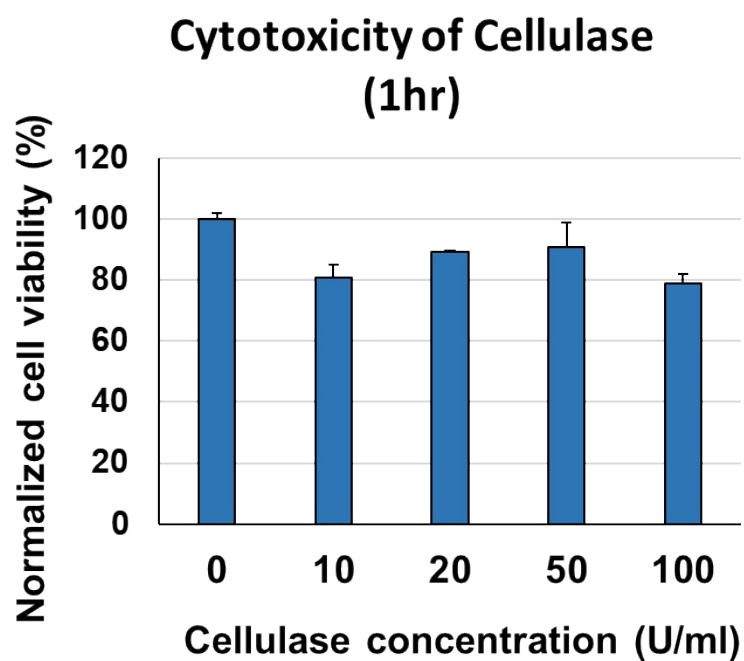

**Movie. S1.** The detachment process of the hMSC sheets 10 min after 50 U/ml cellulase treatment (The file was uploaded separately: Electronic supplementary information)

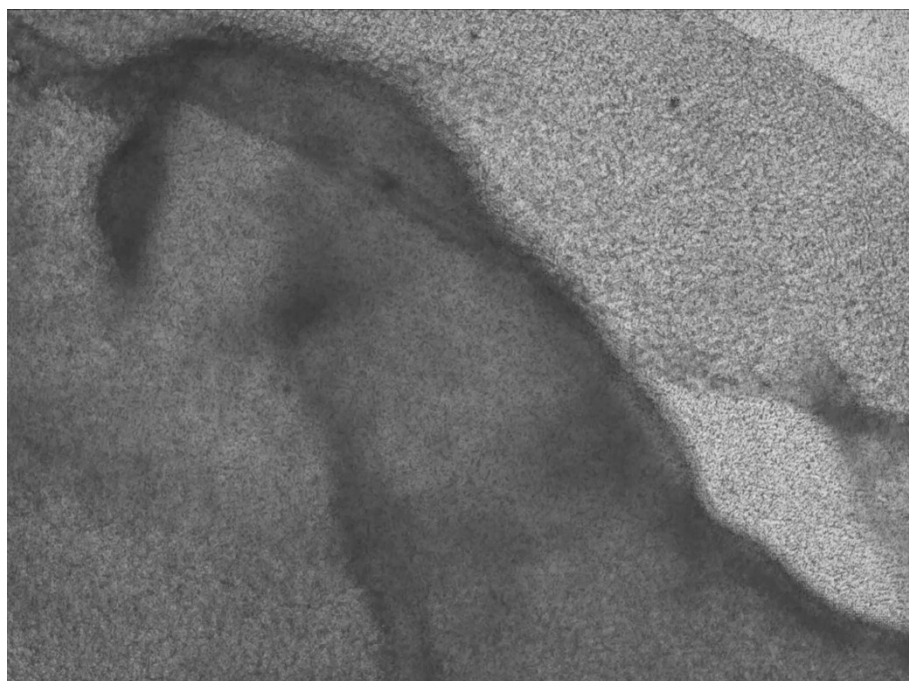

**Figure. S4** Transparency of hCLE sheet with various diameter.

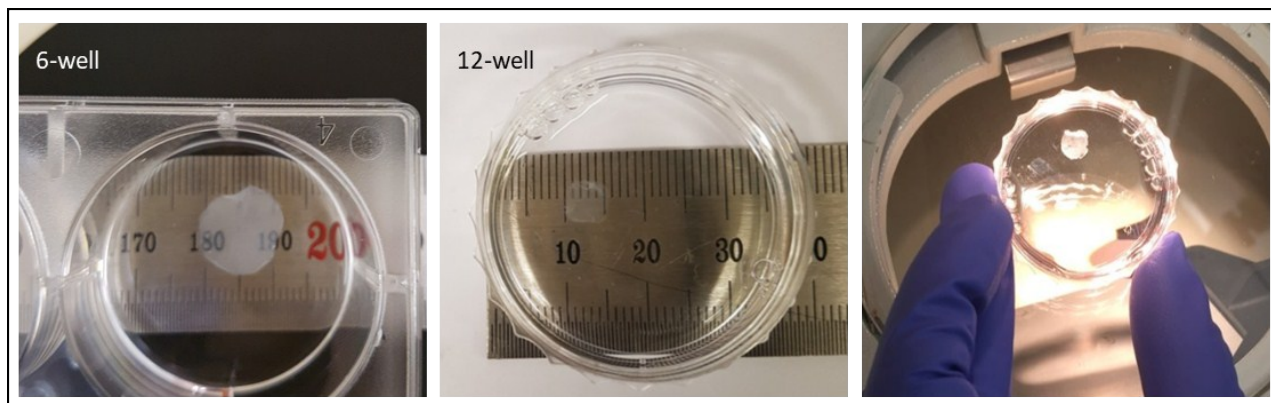

**Figure. S5.** The permeability of a CMC-DA-coated transwell membrane with DMEM medium.

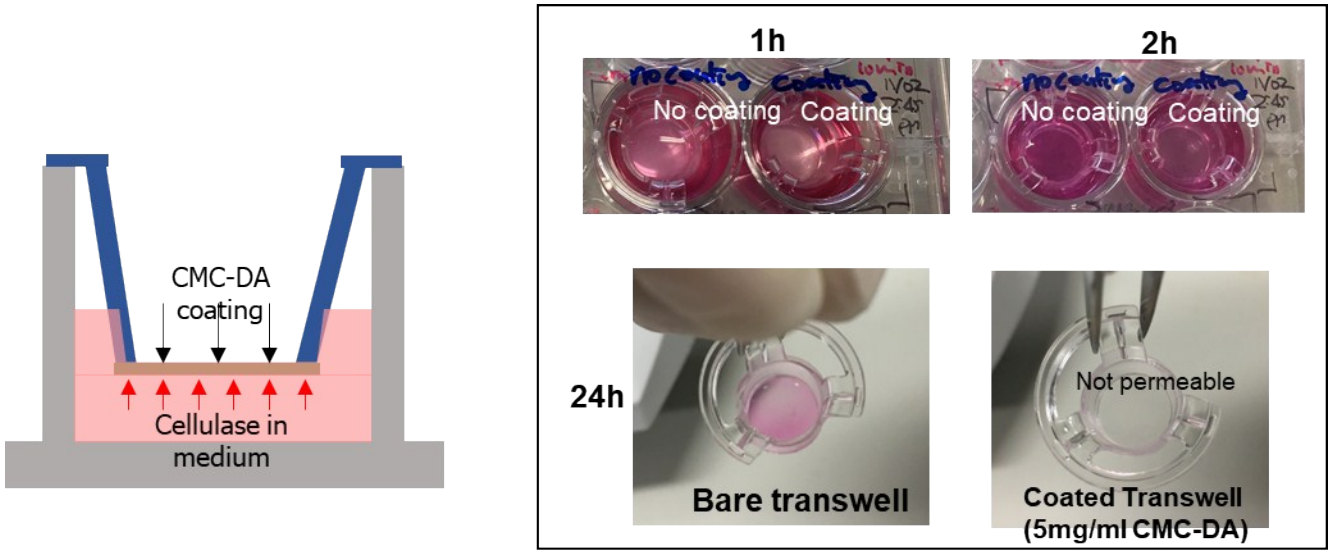

|                     |     | Starting time of Permeabilization |
|---------------------|-----|-----------------------------------|
| CMC-DA Conc.(mg/ml) | 0.5 | 5 min                             |
|                     | 1   | 5 min                             |
|                     | 2   | 60 min                            |
|                     | 5   | > 24 h                            |

**Figure. S6. Degradation of CMC-DA.** The CMC-DA-coated surface was treated with 100 U/ml cellulase for 3 hours, and then we checked the glucose concentration over time using a glucose assay kit (Sigma). The results showed the glucose was increased with time after cellulase treatment.

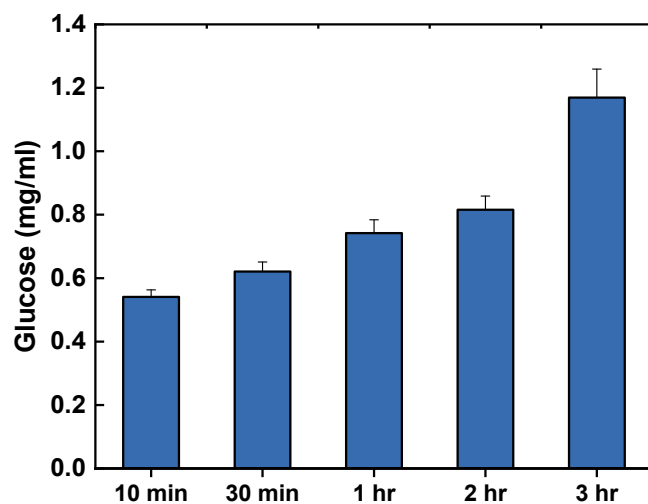

Supplement: c8bm00971f2.pdf [file c8bm00971f2.pdf]
